# Supplementary material for: Ligand–core interaction in ligand-protected Ag25(XR)18 (X = S, Se, Te) superatoms and evaluation of the anchor atom role via relativistic DFT calculations
Source: Royal Society of Chemistry journal article supplement (doi:10.1039/d2cp01058e), 2022-01-01
Supplement: d2cp01058e1.pdf [file d2cp01058e1.pdf]

# Ligand-Core Interaction in Ligand-Protected $\text{Ag}_{25}(\text{XR})_{18}$ (X= S, Se, Te) Superatoms. Evaluation of Anchor Atom Role via Relativistic DFT Calculations

Alvaro Muñoz-Castro<sup>a\*</sup>

<sup>a</sup>*Grupo de Química Inorgánica y Materiales Moleculares, Facultad de Ingeniería, Universidad Autónoma de Chile, El Llano Subercaseaux 2801, Santiago, Chile.*

## Content

**Table S1.** Selected geometrical parameters for  $[\text{Ag}_{25}(\text{XMe})_{18}]^-$  (X=S, Se and Te), values in Å. In addition, CShM values and Hirshfeld charge analysis (a.u.) are given. Page 2

**Table S2.** Selected geometrical parameters for  $[\text{Au}_{25}(\text{XMe})_{18}]^-$  (X=S, Se and Te), values in Å. In addition, CShM values and Hirshfeld charge analysis (a.u.) are given. Page 3

**Table S3.** Energy decomposition analysis for the interaction involving the overall interaction between  $[\text{Au}_{13}]^{5+}$  and the protecting layer ( $\text{PL}^{6-}$ ), at the ground state ( $S_0$ ). Page 4

**Table S4.** Selected geometrical parameters for  $[\text{Ag}_{25}(\text{XMe})_{18}]^-$  (X=S, Se and Te), values in Å, as calculated at the non-relativistic level of theory. Page 5

**Table S5.** Selected geometrical parameters for the  $S_1$  excited state for  $[\text{Ag}_{25}(\text{XMe})_{18}]^-$  (X=S, Se and Te), values in Å, as calculated. Page 5

**Table S6.** Energy decomposition analysis for the interaction involving the overall interaction between  $[\text{Ag}_{13}]^{5+}$  and the protecting layer ( $\text{PL}^{6-}$ ), at the first singlet excited state ( $S_1$ ). Page 6

**Table S7.** Energy decomposition analysis for the interaction involving the overall interaction between  $[\text{Au}_{13}]^{5+}$  and the protecting layer ( $\text{PL}^{6-}$ ), at the first singlet excited state ( $S_1$ ). Page 7

**Figure S1.** Natural transition orbitals related to the first excitation depicted on the calculated optical absorption spectrum for  $[\text{Ag}_{25}(\text{SMe})_{18}]^-$ . Page 8

**Figure S2.** Calculated optical absorption spectrum for  $[\text{Ag}_{25}(\text{XMe})_{18}]^-$  with X=S (1), Se (2) and Te (3), and the respective results obtained at the non-relativistic case (NR). Page 9

**Table S8.** Coordinates for the calculated species, given in Angstroms (Å). Page 10

**Table S1.** Selected geometrical parameters for  $[\text{Ag}_{25}(\text{XMe})_{18}]^-$  (X=S, Se and Te), values in Å. In addition, CShM values and Hirshfeld charge analysis (a.u.) are given.

|                                      | S     | Se    | Te     |
|--------------------------------------|-------|-------|--------|
| CShM                                 | 0.03  | 0.08  | 0.02   |
| Ag-X                                 | 2.439 | 2.581 | 2.670  |
| <sup>a</sup> ∅ Ag <sub>13</sub>      | 2.802 | 2.809 | 2.809  |
| ∅ Ag <sub>12</sub>                   | 4.783 | 4.773 | 4.669  |
| ∅ (XMe) <sub>12</sub>                | 5.104 | 5.378 | 5.530  |
| ∅ (XMe) <sub>6</sub>                 | 6.221 | 6.353 | 6.610  |
| Hirshfeld                            |       |       |        |
| Ag <sub>13</sub>                     | +3.29 | +3.19 | + 3.20 |
| Ag <sub>12</sub> (XMe) <sub>18</sub> | -4.29 | -4.19 | -4.20  |

<sup>a</sup>Radius.

**Table S2.** Selected geometrical parameters for  $[\text{Au}_{25}(\text{XMe})_{18}]^-$  ( $\text{X}=\text{S}$ ,  $\text{Se}$  and  $\text{Te}$ ), values in Å. In addition, CShM values and Hirshfeld charge analysis (a.u.) are given.

|                                      | S     | Se    | Te    |
|--------------------------------------|-------|-------|-------|
| CShM                                 | 0.12  | 0.10  | 0.09  |
| Au-X                                 | 2.453 | 2.562 | 2.672 |
| Au13-Au                              | 3.392 | 3.393 | 3.562 |
| <sup>a</sup> Ø Au <sub>13</sub>      | 2.851 | 2.833 | 2.822 |
| Ø Au <sub>12</sub>                   | 5.085 | 5.164 | 5.362 |
| Ø (SMe) <sub>12</sub>                | 5.155 | 5.305 | 5.463 |
| Ø (SMe) <sub>6</sub>                 | 6.266 | 6.401 | 6.792 |
| Hirshfeld                            |       |       |       |
| Au <sub>13</sub>                     | +2.65 | +2.54 | +1.95 |
| Au <sub>12</sub> (SMe) <sub>18</sub> | -3.65 | -3.54 | -3.95 |

<sup>a</sup>Radius.

Note:  $[\text{Au}_{25}(\text{XMe})_{18}]^-$  ( $\text{X}=\text{S}$ ,  $\text{Se}$  and  $\text{Te}$ ), results taken from reference A. Muñoz-Castro, *Phys. Chem. Chem. Phys.*, 2019, **21**, 13022–13029.

**Table S3.** Energy decomposition analysis for the interaction involving the overall interaction between  $[\text{Au}_{13}]^{5+}$  and the protecting layer ( $\text{PL}^{6-}$ ), at the ground state ( $S_0$ ). Further decomposition of the  $\Delta E_{\text{orb}}$  term is evaluated via EDA-NOCV calculations. Values in  $\text{kcal}\cdot\text{mol}^{-1}$ . In addition, the percentual contribution to the overall orbital term is given.

| $S_0$                      | S       |       | Se      |       | Te      |       |
|----------------------------|---------|-------|---------|-------|---------|-------|
| $\Delta E_{\text{Pauli}}$  | 1392.4  |       | 1320.6  |       | 1185.3  |       |
| $\Delta E_{\text{elstat}}$ | -2639.5 | 67.5% | -2568.4 | 67.0% | -2500.2 | 66.6% |
| $\Delta E_{\text{orb}}$    | -1086.9 | 27.8% | -1053.2 | 27.5% | -1024.3 | 27.3% |
| $\Delta E_{\text{disp}}$   | -185.1  | 4.7%  | -212.6  | 5.5%  | -229.0  | 6.1%  |
| $\Delta E_{\text{int}}$    | -2519.1 |       | -2513.5 |       | -2568.2 |       |
| $\Delta E_{\text{orb}}$    |         |       |         |       |         |       |
| $\Delta\rho_1$             | -62.2   | 5.7%  | -67.9   | 6.4%  | -71.5   | 7.0%  |
| $\Delta\rho_2$             | -61.8   | 5.7%  | -67.4   | 6.4%  | -72.0   | 7.0%  |
| $\Delta\rho_3$             | -61.3   | 5.6%  | -66.8   | 6.3%  | -71.2   | 7.0%  |
| $\Delta\rho_4$             | -62.8   | 5.8%  | -65.5   | 6.2%  | -70.6   | 6.9%  |
| $\Delta\rho_5$             | -60.6   | 5.6%  | -65.9   | 6.3%  | -69.2   | 6.8%  |
| $\Delta\rho_6$             | -43.6   | 4.0%  | -44.5   | 4.2%  | -47.3   | 4.6%  |
| $\Delta\rho_7$             | -43.7   | 4.0%  | -44.9   | 4.3%  | -47.3   | 4.6%  |
| $\Delta\rho_8$             | -43.8   | 4.0%  | -44.7   | 4.2%  | -47.5   | 4.6%  |
| $\Delta\rho_9$             | -44.8   | 4.1%  | -49.7   | 4.7%  | -54.2   | 5.3%  |
|                            |         |       |         |       |         |       |

**Table S4.** Selected geometrical parameters for  $[\text{Ag}_{25}(\text{XMe})_{18}]^-$  (X=S, Se and Te), values in Å, as calculated at the non-relativistic level of theory. In addition, CShM values and Hirshfeld charge analysis (a.u.) are given.

|                                      | S     | Se    | Te     |
|--------------------------------------|-------|-------|--------|
| CShM                                 | 0.03  | 0.06  | 0.03   |
| Ag-X                                 | 2.606 | 2.682 | 2.67   |
| <sup>a</sup> Ø Ag <sub>13</sub>      | 2.837 | 2.849 | 2.861  |
| Ø Ag <sub>12</sub>                   | 4.858 | 4.845 | 4.879  |
| Ø (XMe) <sub>12</sub>                | 5.329 | 5.453 | 5.683  |
| Ø (XMe) <sub>6</sub>                 | 6.375 | 6.680 | 7.020  |
| Hirshfeld                            |       |       |        |
| Ag <sub>13</sub>                     | +3.67 | +3.59 | + 3.43 |
| Ag <sub>12</sub> (XMe) <sub>18</sub> | -4.67 | -4.59 | -4.43  |

<sup>a</sup>Radius.

**Table S5.** Selected geometrical parameters for the S<sub>1</sub> excited state for  $[\text{Ag}_{25}(\text{XMe})_{18}]^-$  (X=S, Se and Te), values in Å, as calculated. In addition, CShM values and Hirshfeld charge analysis (a.u.) are given.

|                                      | S     | Se    | Te     |
|--------------------------------------|-------|-------|--------|
| CShM                                 | 0.13  | 0.09  | 0.02   |
| Ag-X                                 | 2.481 | 2.608 | 2.759  |
| <sup>a</sup> Ø Ag <sub>13</sub>      | 2.845 | 2.801 | 2.812  |
| Ø Ag <sub>12</sub>                   | 5.075 | 4.776 | 4.640  |
| Ø (XMe) <sub>12</sub>                | 5.110 | 5.358 | 5.538  |
| Ø (XMe) <sub>6</sub>                 | 6.301 | 6.498 | 6.691  |
| Hirshfeld                            |       |       |        |
| Ag <sub>13</sub>                     | +3.34 | +3.19 | + 3.21 |
| Ag <sub>12</sub> (XMe) <sub>18</sub> | -4.34 | -4.19 | -4.21  |

<sup>a</sup>Radius.

**Table S6.** Energy decomposition analysis for the interaction involving the overall interaction between  $[\text{Ag}_{13}]^{5+}$  and the protecting layer ( $\text{PL}^{6-}$ ), at the first singlet excited state ( $S_1$ ). Further decomposition of the  $\Delta E_{\text{orb}}$  term is evaluated via EDA-NOCV calculations. Values in  $\text{kcal}\cdot\text{mol}^{-1}$ . In addition, the percentual contribution to the overall orbital term is given.

| $S_1$                      | S       |       | Se      |       | Te      |       |
|----------------------------|---------|-------|---------|-------|---------|-------|
| $\Delta E_{\text{Pauli}}$  | 1161.7  |       | 1225.4  |       | 1283.5  |       |
| $\Delta E_{\text{elstat}}$ | -2459.4 | 72.2% | -2455.8 | 70.8% | -2404.6 | 68.7% |
| $\Delta E_{\text{orb}}$    | -855.5  | 25.1% | -914.6  | 26.4% | -996.9  | 28.5% |
| $\Delta E_{\text{disp}}$   | -92.6   | 2.7%  | -96.2   | 2.8%  | -99.9   | 2.9%  |
| $\Delta E_{\text{int}}$    | -2245.8 |       | -2241.1 |       | -2217.8 |       |
| $\Delta E_{\text{orb}}$    |         |       |         |       |         |       |
| $\Delta\rho_1$             | -73.5   | 8.6%  | -33.7   | 3.7%  | -40.5   | 4.1%  |
| $\Delta\rho_2$             | -62.1   | 7.3%  | -29.3   | 3.2%  | -33.6   | 3.4%  |
| $\Delta\rho_3$             | -42.9   | 5.0%  | -24.9   | 2.7%  | -29.6   | 3.0%  |
| $\Delta\rho_4$             | -42.9   | 5.0%  | -24.5   | 2.7%  | -28.1   | 2.8%  |
| $\Delta\rho_5$             | -42.6   | 5.0%  | -23.8   | 2.6%  | -28.0   | 2.8%  |
| $\Delta\rho_6$             | -42.4   | 5.0%  | -15.2   | 1.7%  | -17.7   | 1.8%  |
| $\Delta\rho_7$             | -36.8   | 4.3%  | -14.0   | 1.5%  | -17.2   | 1.7%  |
| $\Delta\rho_8$             | -26.4   | 3.1%  | -12.8   | 1.4%  | -13.8   | 1.4%  |
| $\Delta\rho_9$             | -26.0   | 3.0%  | -11.5   | 1.3%  | -12.6   | 1.3%  |
|                            |         |       |         |       |         |       |

**Table S7.** Energy decomposition analysis for the interaction involving the overall interaction between  $[\text{Au}_{13}]^{5+}$  and the protecting layer ( $\text{PL}^{6-}$ ), at the first singlet excited state ( $S_1$ ). Further decomposition of the  $\Delta E_{\text{orb}}$  term is evaluated via EDA-NOCV calculations. Values in  $\text{kcal}\cdot\text{mol}^{-1}$ . In addition, the percentual contribution to the overall orbital term is given.

| $S_1$                      | S       |       | Se      |       | Te      |       |
|----------------------------|---------|-------|---------|-------|---------|-------|
| $\Delta E_{\text{Pauli}}$  | 1458.3  |       | 1390.2  |       | 1375.7  |       |
| $\Delta E_{\text{Elstat}}$ | -2714.4 | 68.0% | -2555.1 | 69.5% | -2557.8 | 65.4% |
| $\Delta E_{\text{Orb}}$    | -1096.1 | 27.4% | -910.9  | 24.8% | -1136.4 | 29.0% |
| $\Delta E_{\text{Disp}}$   | -183.1  | 4.6%  | -208.6  | 5.7%  | -218.0  | 5.6%  |
| $\Delta E_{\text{int}}$    | -2535.3 |       | -2284.3 |       | -2536.6 |       |
| $\Delta E_{\text{Orb}}$    |         |       |         |       |         |       |
| $\Delta\rho_1$             | -62.2   | 5.7%  | -67.9   | 7.5%  | -71.5   | 6.3%  |
| $\Delta\rho_2$             | -61.8   | 5.6%  | -67.4   | 7.4%  | -72.0   | 6.3%  |
| $\Delta\rho_3$             | -61.3   | 5.6%  | -66.8   | 7.3%  | -71.2   | 6.3%  |
| $\Delta\rho_4$             | -62.8   | 5.7%  | -65.5   | 7.2%  | -70.6   | 6.2%  |
| $\Delta\rho_5$             | -60.6   | 5.5%  | -65.9   | 7.2%  | -69.2   | 6.1%  |
| $\Delta\rho_6$             | -43.6   | 4.0%  | -44.5   | 4.9%  | -47.3   | 4.2%  |
| $\Delta\rho_7$             | -43.7   | 4.0%  | -44.9   | 4.9%  | -47.3   | 4.2%  |
| $\Delta\rho_8$             | -43.8   | 4.0%  | -44.7   | 4.9%  | -47.5   | 4.2%  |
| $\Delta\rho_9$             | -44.8   | 4.1%  | -49.7   | 5.5%  | -54.2   | 4.8%  |
|                            |         |       |         |       |         |       |

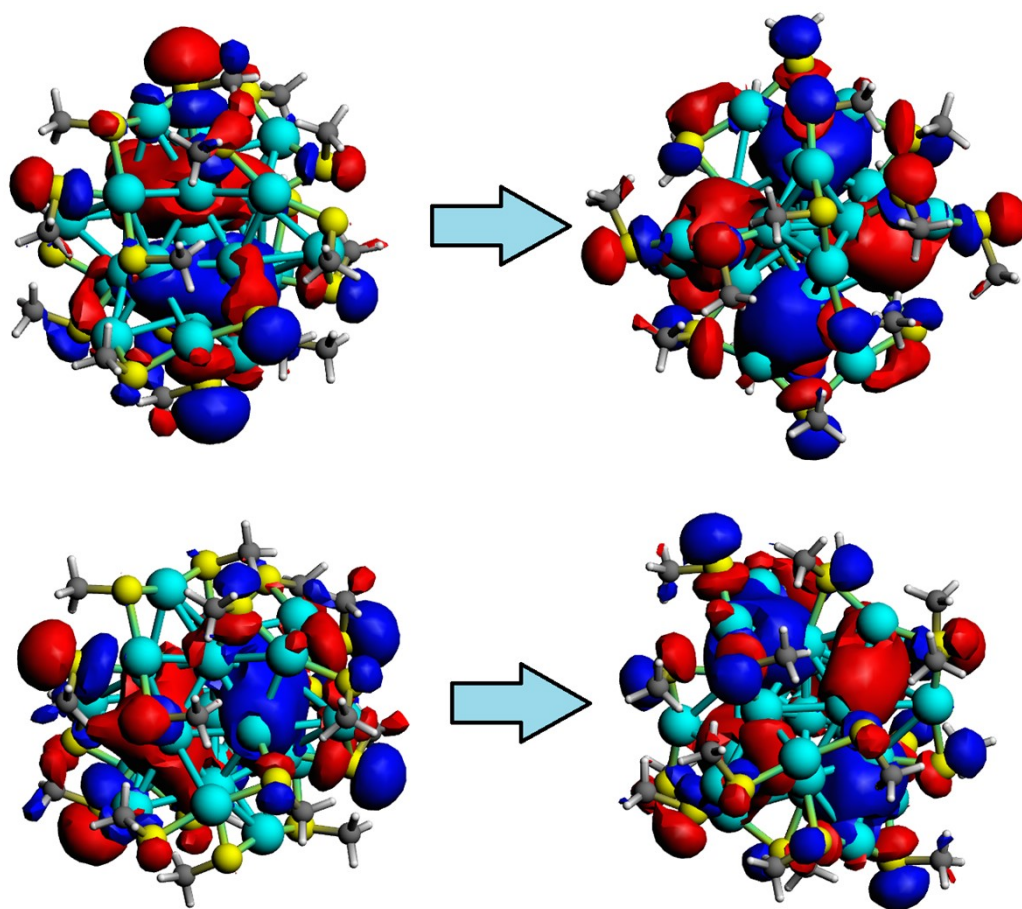

Figure S1. Natural transition orbitals related to the first excitation depicted on the calculated optical absorption spectrum for [Ag<sub>25</sub>(SMe)<sub>18</sub>]<sup>-</sup>.



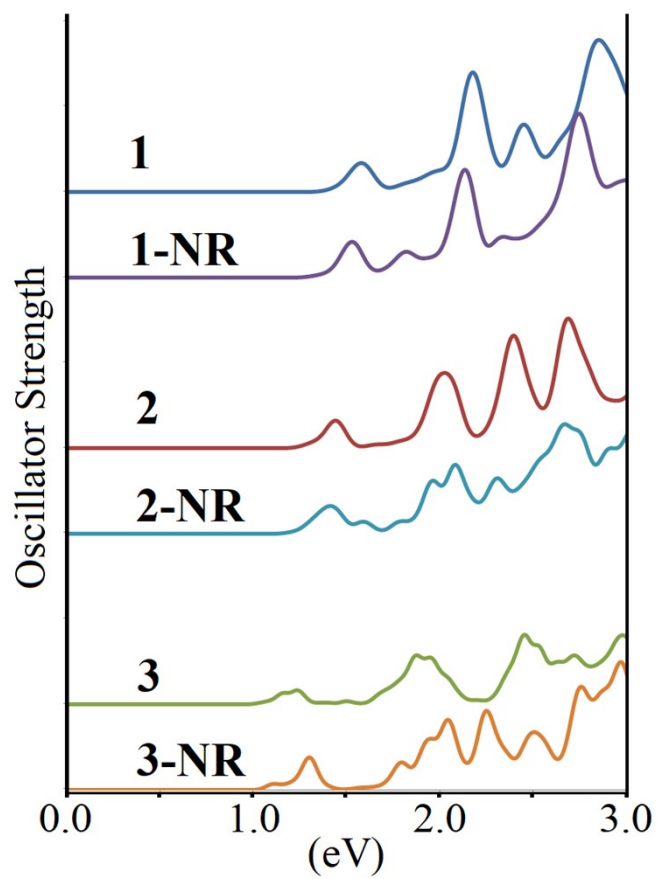

Figure S2. Calculated optical absorption spectrum for  $[Ag_{25}(XMe)_{18}]^-$  with  $X=S$  (1),  $Se$  (2) and  $Te$  (3), and the respective results obtained at the non-relativistic case (NR).

Table S8. Coordinates for the calculated species, given in Angstroms (Å).

115

Ag<sub>25</sub>(SMe)<sub>18</sub>- S<sub>0</sub> Ground State

|    |              |              |              |
|----|--------------|--------------|--------------|
| Ag | -0.051033000 | 0.055484000  | -0.063962000 |
| Ag | -2.059387000 | 1.646413000  | -1.210718000 |
| Ag | -0.780584000 | -2.369675000 | 1.134015000  |
| Ag | 0.711260000  | 2.466399000  | -1.238520000 |
| Ag | 1.977482000  | -1.523703000 | 1.097609000  |
| Ag | -2.142456000 | -1.318025000 | -1.305906000 |
| Ag | 2.453302000  | 0.109518000  | -1.375160000 |
| Ag | -2.563690000 | 0.028859000  | 1.196389000  |
| Ag | 2.050568000  | 1.442238000  | 1.131762000  |
| Ag | -0.123795000 | 0.067877000  | -2.875371000 |
| Ag | -0.743081000 | 2.384394000  | 1.316182000  |
| Ag | 0.642902000  | -2.287193000 | -1.408834000 |
| Ag | -0.014745000 | -0.010275000 | 2.737557000  |
| Ag | 3.640862000  | 2.948712000  | -1.022846000 |
| S  | 5.799941000  | 2.029589000  | -0.361235000 |
| Ag | 4.713901000  | 0.150871000  | 0.769446000  |
| C  | 6.544995000  | 1.320953000  | -1.892209000 |
| H  | 7.461865000  | 0.789359000  | -1.607701000 |
| H  | 5.849928000  | 0.620128000  | -2.375037000 |
| H  | 6.793840000  | 2.141968000  | -2.576830000 |
| Ag | -4.773838000 | 0.046925000  | -0.934147000 |
| S  | -5.897496000 | -1.895592000 | 0.031894000  |
| Ag | -3.772667000 | -2.963866000 | 0.622097000  |
| C  | -6.718913000 | -1.353923000 | 1.587658000  |
| H  | -7.602322000 | -0.758580000 | 1.327578000  |
| H  | -6.034449000 | -0.751146000 | 2.200240000  |
| H  | -7.029197000 | -2.247753000 | 2.141410000  |
| Ag | -2.204241000 | 1.676837000  | 3.902431000  |
| S  | -0.777936000 | 3.360619000  | 4.938300000  |
| Ag | 1.221075000  | 2.576069000  | 3.757072000  |
| C  | -0.406459000 | 2.676250000  | 6.618850000  |
| H  | 0.297163000  | 3.354501000  | 7.117007000  |
| H  | 0.050002000  | 1.682648000  | 6.534724000  |
| H  | -1.335155000 | 2.616554000  | 7.198839000  |
| Ag | -1.301082000 | -2.605061000 | -3.837552000 |
| S  | 0.479222000  | -2.992746000 | -5.461338000 |
| Ag | 2.079531000  | -1.939291000 | -3.953461000 |
| C  | 0.199499000  | -1.787089000 | -6.829614000 |
| H  | 1.060703000  | -1.835320000 | -7.506323000 |
| H  | 0.097939000  | -0.767289000 | -6.436018000 |
| H  | -0.709234000 | -2.074191000 | -7.372663000 |
| Ag | 1.350538000  | -4.488202000 | 0.638451000  |
| S  | 1.413521000  | -4.954382000 | 3.044101000  |
| Ag | 0.899317000  | -2.664144000 | 3.705375000  |
| C  | 3.212128000  | -5.068035000 | 3.441144000  |
| H  | 3.337641000  | -5.057161000 | 4.530413000  |
| H  | 3.757974000  | -4.229094000 | 2.989004000  |
| H  | 3.592844000  | -6.013324000 | 3.035872000  |
| Ag | -0.744542000 | 3.083794000  | -3.728822000 |
| S  | -1.624027000 | 5.253213000  | -3.073068000 |
| Ag | -1.433761000 | 4.619951000  | -0.715437000 |
| C  | -3.416276000 | 5.213855000  | -3.499331000 |

|   |              |              |              |
|---|--------------|--------------|--------------|
| H | -3.907225000 | 6.064988000  | -3.012073000 |
| H | -3.874523000 | 4.276200000  | -3.153848000 |
| H | -3.518697000 | 5.302623000  | -4.587359000 |
| S | -3.299680000 | -3.230057000 | -2.511755000 |
| S | -4.012052000 | 0.170228000  | 3.251567000  |
| S | 4.082884000  | -1.157821000 | -2.801670000 |
| S | 3.538900000  | 2.305543000  | 2.982344000  |
| S | -4.246418000 | 1.921107000  | -2.431865000 |
| S | -2.020149000 | -4.547482000 | 1.293189000  |
| S | 1.926942000  | 4.676673000  | -1.450545000 |
| S | 4.272773000  | -1.901065000 | 2.030132000  |
| S | 1.340176000  | -4.667088000 | -1.815365000 |
| S | 0.700002000  | -0.625590000 | 5.100467000  |
| S | 0.331832000  | 1.312718000  | -5.016597000 |
| S | -1.272640000 | 4.792482000  | 1.733489000  |
| C | -0.856128000 | -0.871080000 | 6.070934000  |
| H | -1.308073000 | -1.843133000 | 5.853286000  |
| H | -0.600911000 | -0.820398000 | 7.137048000  |
| H | -1.576140000 | -0.076584000 | 5.826512000  |
| C | -0.315322000 | -5.458106000 | -2.065583000 |
| H | -1.065190000 | -5.039895000 | -1.385887000 |
| H | -0.225045000 | -6.534272000 | -1.880179000 |
| H | -0.627740000 | -5.284582000 | -3.102368000 |
| C | 0.447231000  | 5.455617000  | 1.882555000  |
| H | 1.106507000  | 5.014083000  | 1.127091000  |
| H | 0.426334000  | 6.542072000  | 1.741962000  |
| H | 0.819286000  | 5.215017000  | 2.886993000  |
| C | 2.137568000  | 1.626367000  | -4.769943000 |
| H | 2.364095000  | 1.823322000  | -3.713095000 |
| H | 2.445317000  | 2.479674000  | -5.384364000 |
| H | 2.687385000  | 0.728895000  | -5.080967000 |
| C | 4.031155000  | 3.979260000  | 2.363202000  |
| H | 3.236999000  | 4.434621000  | 1.763601000  |
| H | 4.258925000  | 4.623732000  | 3.219987000  |
| H | 4.926704000  | 3.856517000  | 1.742395000  |
| C | 4.434839000  | -2.567742000 | -1.655545000 |
| H | 3.548436000  | -2.819818000 | -1.059956000 |
| H | 4.740057000  | -3.442342000 | -2.240507000 |
| H | 5.241604000  | -2.262887000 | -0.977849000 |
| C | -3.521798000 | -1.489985000 | 3.894940000  |
| H | -2.461720000 | -1.680980000 | 3.693208000  |
| H | -3.712515000 | -1.545263000 | 4.971343000  |
| H | -4.118550000 | -2.245894000 | 3.366529000  |
| C | -4.772054000 | -2.508136000 | -3.366217000 |
| H | -4.630317000 | -1.442927000 | -3.571421000 |
| H | -4.941331000 | -3.045678000 | -4.306742000 |
| H | -5.636939000 | -2.633028000 | -2.703541000 |
| C | 4.070303000  | -1.212453000 | 3.735168000  |
| H | 3.425797000  | -0.327983000 | 3.730519000  |
| H | 5.054100000  | -0.935330000 | 4.128488000  |
| H | 3.618581000  | -1.982835000 | 4.372219000  |
| C | -2.199398000 | -4.854727000 | 3.107506000  |
| H | -2.341541000 | -3.917616000 | 3.655252000  |
| H | -3.060618000 | -5.512148000 | 3.275516000  |
| H | -1.281999000 | -5.343158000 | 3.457969000  |
| C | 2.070563000  | 5.141257000  | -3.234122000 |

|   |              |             |              |
|---|--------------|-------------|--------------|
| H | 2.151380000  | 4.252448000 | -3.867483000 |
| H | 2.956740000  | 5.772965000 | -3.369260000 |
| H | 1.167838000  | 5.699683000 | -3.508645000 |
| C | -3.721483000 | 1.091066000 | -4.000977000 |
| H | -2.995137000 | 0.290775000 | -3.802461000 |
| H | -4.598186000 | 0.682247000 | -4.516394000 |
| H | -3.240108000 | 1.843184000 | -4.639644000 |

115

Ag25(SMe)18- S1 Excited State

|    |              |              |              |
|----|--------------|--------------|--------------|
| Ag | -0.052900000 | 0.064452000  | -0.057283000 |
| Ag | -2.058816000 | 1.656747000  | -1.237604000 |
| Ag | -0.803113000 | -2.346797000 | 1.184543000  |
| Ag | 0.729975000  | 2.459704000  | -1.265878000 |
| Ag | 1.964469000  | -1.518824000 | 1.129451000  |
| Ag | -2.155933000 | -1.271854000 | -1.317787000 |
| Ag | 2.465738000  | 0.141880000  | -1.350728000 |
| Ag | -2.585443000 | 0.021403000  | 1.173265000  |
| Ag | 2.071527000  | 1.422457000  | 1.154205000  |
| Ag | -0.108809000 | 0.107371000  | -2.874306000 |
| Ag | -0.759833000 | 2.360870000  | 1.358928000  |
| Ag | 0.655417000  | -2.245729000 | -1.427762000 |
| Ag | -0.022849000 | -0.016654000 | 2.735817000  |
| Ag | 3.667144000  | 2.925381000  | -0.977109000 |
| S  | 5.848997000  | 1.996189000  | -0.373447000 |
| Ag | 4.726202000  | 0.153045000  | 0.793551000  |
| C  | 6.541835000  | 1.223418000  | -1.898515000 |
| H  | 7.433598000  | 0.650817000  | -1.614177000 |
| H  | 5.807587000  | 0.552745000  | -2.365379000 |
| H  | 6.823914000  | 2.019085000  | -2.599328000 |
| Ag | -4.802844000 | 0.036141000  | -0.923235000 |
| S  | -5.934538000 | -1.911228000 | 0.034415000  |
| Ag | -3.759161000 | -2.940653000 | 0.542444000  |
| C  | -6.696923000 | -1.332707000 | 1.607527000  |
| H  | -7.580071000 | -0.727075000 | 1.364799000  |
| H  | -5.982196000 | -0.731443000 | 2.187052000  |
| H  | -7.003800000 | -2.212550000 | 2.187336000  |
| Ag | -2.163501000 | 1.695261000  | 3.946106000  |
| S  | -0.781078000 | 3.423123000  | 4.966970000  |
| Ag | 1.176559000  | 2.576401000  | 3.734991000  |
| C  | -0.403486000 | 2.763971000  | 6.655278000  |
| H  | 0.323004000  | 3.431142000  | 7.131733000  |
| H  | 0.022415000  | 1.756945000  | 6.586122000  |
| H  | -1.325961000 | 2.741576000  | 7.246535000  |
| Ag | -1.217142000 | -2.545507000 | -3.811808000 |
| S  | 0.463155000  | -3.081636000 | -5.539138000 |
| Ag | 2.007369000  | -1.973598000 | -3.999448000 |
| C  | 0.182158000  | -1.861486000 | -6.894029000 |
| H  | 1.028531000  | -1.917144000 | -7.589604000 |
| H  | 0.110214000  | -0.842020000 | -6.494690000 |
| H  | -0.742875000 | -2.123874000 | -7.420886000 |
| Ag | 1.241972000  | -4.449386000 | 0.792915000  |
| S  | 1.396728000  | -5.011444000 | 3.192014000  |
| Ag | 0.866467000  | -2.666448000 | 3.684409000  |
| C  | 3.215072000  | -5.081297000 | 3.504331000  |
| H  | 3.392339000  | -5.049500000 | 4.587059000  |
| H  | 3.723878000  | -4.239599000 | 3.014079000  |

|    |              |              |              |
|----|--------------|--------------|--------------|
| H  | 3.596825000  | -6.024858000 | 3.095918000  |
| Ag | -0.755867000 | 3.017263000  | -3.709656000 |
| S  | -1.607165000 | 5.286469000  | -3.259813000 |
| Ag | -1.342410000 | 4.576417000  | -0.907532000 |
| C  | -3.425873000 | 5.226480000  | -3.561489000 |
| H  | -3.887215000 | 6.090695000  | -3.066826000 |
| H  | -3.856662000 | 4.298062000  | -3.159836000 |
| H  | -3.604510000 | 5.282416000  | -4.643517000 |
| S  | -3.244634000 | -3.238536000 | -2.526325000 |
| S  | -3.958542000 | 0.182895000  | 3.292968000  |
| S  | 3.998371000  | -1.152569000 | -2.851062000 |
| S  | 3.527645000  | 2.300289000  | 3.030127000  |
| S  | -4.310548000 | 1.942749000  | -2.386593000 |
| S  | -2.020194000 | -4.566618000 | 1.151395000  |
| S  | 1.975975000  | 4.690607000  | -1.292384000 |
| S  | 4.279538000  | -1.925126000 | 2.015117000  |
| S  | 1.377533000  | -4.620294000 | -1.649019000 |
| S  | 0.712960000  | -0.610817000 | 5.101884000  |
| S  | 0.365788000  | 1.274925000  | -5.069817000 |
| S  | -1.358134000 | 4.758974000  | 1.542919000  |
| C  | -0.835310000 | -0.841274000 | 6.088352000  |
| H  | -1.293669000 | -1.810538000 | 5.875918000  |
| H  | -0.568461000 | -0.791221000 | 7.150924000  |
| H  | -1.554543000 | -0.042592000 | 5.853002000  |
| C  | -0.226578000 | -5.438250000 | -2.067719000 |
| H  | -1.031373000 | -5.080575000 | -1.418210000 |
| H  | -0.109328000 | -6.519472000 | -1.932474000 |
| H  | -0.469973000 | -5.216114000 | -3.112608000 |
| C  | 0.303917000  | 5.494335000  | 1.878563000  |
| H  | 1.042470000  | 5.126652000  | 1.157601000  |
| H  | 0.224962000  | 6.584507000  | 1.784541000  |
| H  | 0.599229000  | 5.225510000  | 2.899751000  |
| C  | 2.156132000  | 1.639242000  | -4.781426000 |
| H  | 2.349975000  | 1.866963000  | -3.723517000 |
| H  | 2.458780000  | 2.489120000  | -5.404203000 |
| H  | 2.743039000  | 0.754900000  | -5.056781000 |
| C  | 4.053401000  | 3.959229000  | 2.401816000  |
| H  | 3.279242000  | 4.413196000  | 1.775221000  |
| H  | 4.263690000  | 4.614603000  | 3.254243000  |
| H  | 4.963567000  | 3.823400000  | 1.805066000  |
| C  | 4.430948000  | -2.540946000 | -1.710541000 |
| H  | 3.572763000  | -2.817285000 | -1.087689000 |
| H  | 4.746701000  | -3.409342000 | -2.296086000 |
| H  | 5.246906000  | -2.204176000 | -1.059196000 |
| C  | -3.486520000 | -1.494088000 | 3.905286000  |
| H  | -2.429409000 | -1.701037000 | 3.690746000  |
| H  | -3.669172000 | -1.560898000 | 4.985131000  |
| H  | -4.101511000 | -2.234572000 | 3.369499000  |
| C  | -4.713816000 | -2.508104000 | -3.370506000 |
| H  | -4.588182000 | -1.433357000 | -3.535664000 |
| H  | -4.861809000 | -3.009620000 | -4.334114000 |
| H  | -5.588995000 | -2.669348000 | -2.729233000 |
| C  | 4.073501000  | -1.279198000 | 3.736084000  |
| H  | 3.510662000  | -0.338999000 | 3.743813000  |
| H  | 5.064538000  | -1.105151000 | 4.170439000  |
| H  | 3.532676000  | -2.027358000 | 4.329992000  |

|   |              |              |              |
|---|--------------|--------------|--------------|
| C | -2.177693000 | -4.905261000 | 2.959400000  |
| H | -2.311295000 | -3.976712000 | 3.524247000  |
| H | -3.041630000 | -5.560975000 | 3.122988000  |
| H | -1.261029000 | -5.404669000 | 3.297680000  |
| C | 2.026327000  | 5.138076000  | -3.084284000 |
| H | 1.970209000  | 4.246509000  | -3.718462000 |
| H | 2.954885000  | 5.682044000  | -3.295461000 |
| H | 1.160266000  | 5.779065000  | -3.294658000 |
| C | -3.780250000 | 1.150473000  | -3.973531000 |
| H | -3.070118000 | 0.329471000  | -3.796539000 |
| H | -4.657468000 | 0.773029000  | -4.512254000 |
| H | -3.277319000 | 1.915911000  | -4.580841000 |

115

Ag25(SeMe)18- S0 Ground State

|    |              |              |              |
|----|--------------|--------------|--------------|
| Ag | -0.032239000 | 0.053495000  | 0.003779000  |
| Ag | -2.068222000 | 1.604598000  | -1.129548000 |
| Ag | -0.689430000 | -2.400210000 | 1.215557000  |
| Ag | 0.626295000  | 2.479237000  | -1.185622000 |
| Ag | 1.998054000  | -1.514194000 | 1.129287000  |
| Ag | -2.152771000 | -1.369181000 | -1.184792000 |
| Ag | 2.420849000  | 0.178880000  | -1.316612000 |
| Ag | -2.544747000 | -0.021257000 | 1.253400000  |
| Ag | 2.059573000  | 1.434137000  | 1.211939000  |
| Ag | -0.183066000 | -0.010266000 | -2.789400000 |
| Ag | -0.778690000 | 2.355376000  | 1.414280000  |
| Ag | 0.719148000  | -2.267457000 | -1.389337000 |
| Ag | 0.026002000  | -0.008920000 | 2.788043000  |
| Ag | 3.615608000  | 3.019407000  | -0.688079000 |
| Se | 5.878203000  | 2.156144000  | 0.177885000  |
| Ag | 4.621280000  | -0.012681000 | 0.777869000  |
| C  | 6.802489000  | 1.687928000  | -1.547943000 |
| H  | 7.606847000  | 0.983372000  | -1.316002000 |
| H  | 6.073886000  | 1.237560000  | -2.232084000 |
| H  | 7.207890000  | 2.610908000  | -1.974026000 |
| Ag | -4.748408000 | 0.160223000  | -0.743540000 |
| Se | -5.993378000 | -2.032887000 | -0.175225000 |
| Ag | -3.746485000 | -2.949902000 | 0.696694000  |
| C  | -7.068452000 | -1.413481000 | 1.413217000  |
| H  | -7.922964000 | -0.841664000 | 1.038463000  |
| H  | -6.431343000 | -0.782999000 | 2.044591000  |
| H  | -7.402293000 | -2.303810000 | 1.954755000  |
| Ag | -2.327023000 | 1.728682000  | 3.866168000  |
| Se | -0.907974000 | 3.568349000  | 4.980917000  |
| Ag | 1.139345000  | 2.507601000  | 3.806827000  |
| C  | -0.439277000 | 2.936240000  | 6.848617000  |
| H  | 0.256246000  | 3.666324000  | 7.272775000  |
| H  | 0.036758000  | 1.952461000  | 6.795841000  |
| H  | -1.364439000 | 2.895480000  | 7.431231000  |
| Ag | -1.100847000 | -2.878243000 | -3.608859000 |
| Se | 0.820461000  | -3.452680000 | -5.225375000 |
| Ag | 2.130902000  | -1.666255000 | -3.913793000 |
| C  | 0.169299000  | -2.495686000 | -6.872924000 |
| H  | 1.025350000  | -2.332498000 | -7.534719000 |
| H  | -0.284649000 | -1.543000000 | -6.574144000 |
| H  | -0.576275000 | -3.135696000 | -7.355023000 |
| Ag | 1.569261000  | -4.368194000 | 0.695596000  |

|    |              |              |              |
|----|--------------|--------------|--------------|
| Se | 1.189117000  | -5.071292000 | 3.168030000  |
| Ag | 1.011992000  | -2.579669000 | 3.763638000  |
| C  | 3.077417000  | -5.421643000 | 3.770489000  |
| H  | 3.148550000  | -5.240881000 | 4.847718000  |
| H  | 3.750907000  | -4.763905000 | 3.211767000  |
| H  | 3.299397000  | -6.468952000 | 3.540225000  |
| Ag | -0.988529000 | 2.830343000  | -3.689475000 |
| Se | -1.287267000 | 5.319930000  | -3.115350000 |
| Ag | -1.592260000 | 4.496323000  | -0.682079000 |
| C  | -3.196596000 | 5.538023000  | -3.731863000 |
| H  | -3.504823000 | 6.554398000  | -3.473081000 |
| H  | -3.813619000 | 4.808467000  | -3.197994000 |
| H  | -3.240597000 | 5.382132000  | -4.812451000 |
| Se | -3.345024000 | -3.402635000 | -2.445862000 |
| Se | -4.373120000 | 0.374399000  | 3.107257000  |
| Se | 4.146164000  | -0.190613000 | -3.249549000 |
| Se | 3.626841000  | 1.950798000  | 3.321394000  |
| Se | -4.447170000 | 2.521133000  | -1.799656000 |
| Se | -1.990955000 | -4.691786000 | 1.401425000  |
| Se | 1.890548000  | 4.800999000  | -1.411549000 |
| Se | 4.395419000  | -2.456447000 | 1.658277000  |
| Se | 2.059788000  | -4.521186000 | -1.833733000 |
| Se | 1.005316000  | -0.426610000 | 5.238976000  |
| Se | -0.769475000 | 0.758253000  | -5.237251000 |
| Se | -1.767659000 | 4.764102000  | 1.872313000  |
| C  | -0.767846000 | -0.663608000 | 6.214622000  |
| H  | -1.282262000 | -1.543126000 | 5.828104000  |
| H  | -0.532298000 | -0.787661000 | 7.275052000  |
| H  | -1.369077000 | 0.236092000  | 6.042351000  |
| C  | 0.515294000  | -5.772735000 | -2.247289000 |
| H  | -0.388060000 | -5.406677000 | -1.751728000 |
| H  | 0.785998000  | -6.763029000 | -1.869236000 |
| H  | 0.384160000  | -5.780121000 | -3.332638000 |
| C  | 0.054827000  | 5.648422000  | 2.044968000  |
| H  | 0.793405000  | 5.070630000  | 1.479369000  |
| H  | -0.021407000 | 6.662977000  | 1.643167000  |
| H  | 0.304433000  | 5.653470000  | 3.110140000  |
| C  | 1.122645000  | 1.058820000  | -5.890823000 |
| H  | 1.744541000  | 1.394798000  | -5.057423000 |
| H  | 1.093278000  | 1.809461000  | -6.686615000 |
| H  | 1.487534000  | 0.097628000  | -6.265842000 |
| C  | 4.345867000  | 3.812671000  | 2.956342000  |
| H  | 3.807298000  | 4.236892000  | 2.109522000  |
| H  | 4.191900000  | 4.413564000  | 3.853399000  |
| H  | 5.405063000  | 3.708866000  | 2.722254000  |
| C  | 5.174904000  | -1.676606000 | -2.321468000 |
| H  | 4.472373000  | -2.309729000 | -1.773912000 |
| H  | 5.696588000  | -2.250253000 | -3.092473000 |
| H  | 5.877711000  | -1.203309000 | -1.629841000 |
| C  | -3.942634000 | -1.397657000 | 3.993613000  |
| H  | -2.876019000 | -1.599716000 | 3.876835000  |
| H  | -4.217738000 | -1.328755000 | 5.048352000  |
| H  | -4.526433000 | -2.172577000 | 3.484162000  |
| C  | -4.583126000 | -2.312296000 | -3.631000000 |
| H  | -4.147498000 | -1.327263000 | -3.810501000 |
| H  | -4.707887000 | -2.855851000 | -4.569613000 |

|   |              |              |              |
|---|--------------|--------------|--------------|
| H | -5.532995000 | -2.215373000 | -3.100753000 |
| C | 4.507793000  | -1.947480000 | 3.620822000  |
| H | 4.131700000  | -0.929573000 | 3.750716000  |
| H | 5.558980000  | -2.007856000 | 3.913671000  |
| H | 3.897464000  | -2.655835000 | 4.189632000  |
| C | -2.398947000 | -4.849304000 | 3.395973000  |
| H | -2.315997000 | -3.863662000 | 3.857265000  |
| H | -3.414604000 | -5.238508000 | 3.494513000  |
| H | -1.658299000 | -5.533015000 | 3.813472000  |
| C | 2.331770000  | 4.754807000  | -3.396448000 |
| H | 2.336323000  | 3.719829000  | -3.748388000 |
| H | 3.313616000  | 5.216693000  | -3.533383000 |
| H | 1.546967000  | 5.325006000  | -3.902107000 |
| C | -4.383357000 | 1.888344000  | -3.726395000 |
| H | -3.781802000 | 0.977114000  | -3.791002000 |
| H | -5.408947000 | 1.700130000  | -4.057623000 |
| H | -3.919133000 | 2.682635000  | -4.319617000 |

115

Ag25 (SeMe)18- S1 Excited State

|    |              |              |              |
|----|--------------|--------------|--------------|
| Ag | -0.029509000 | 0.083591000  | 0.073523000  |
| Ag | -2.059759000 | 1.613915000  | -1.124402000 |
| Ag | -0.815926000 | -2.343633000 | 1.305083000  |
| Ag | 0.692330000  | 2.525981000  | -1.140189000 |
| Ag | 1.977263000  | -1.474215000 | 1.248565000  |
| Ag | -2.129104000 | -1.288148000 | -1.235073000 |
| Ag | 2.437712000  | 0.258681000  | -1.241301000 |
| Ag | -2.574011000 | -0.012992000 | 1.273826000  |
| Ag | 2.070780000  | 1.422294000  | 1.333955000  |
| Ag | -0.096930000 | 0.172716000  | -2.707765000 |
| Ag | -0.780044000 | 2.397010000  | 1.472437000  |
| Ag | 0.728790000  | -2.247693000 | -1.303467000 |
| Ag | -0.042321000 | -0.059062000 | 2.856769000  |
| Ag | 3.747204000  | 2.982137000  | -0.459848000 |
| Se | 6.020912000  | 2.012203000  | 0.259675000  |
| Ag | 4.602241000  | -0.087642000 | 0.814114000  |
| C  | 6.828020000  | 1.588431000  | -1.539330000 |
| H  | 7.556271000  | 0.783628000  | -1.403330000 |
| H  | 6.029242000  | 1.285527000  | -2.225420000 |
| H  | 7.316877000  | 2.498299000  | -1.901611000 |
| Ag | -4.733063000 | 0.369333000  | -0.671492000 |
| Se | -5.988703000 | -1.845491000 | -0.251723000 |
| Ag | -3.773689000 | -2.912269000 | 0.503709000  |
| C  | -6.963944000 | -1.347038000 | 1.442454000  |
| H  | -7.769545000 | -0.654871000 | 1.179944000  |
| H  | -6.253595000 | -0.874782000 | 2.130371000  |
| H  | -7.366292000 | -2.270466000 | 1.870774000  |
| Ag | -2.233294000 | 1.725719000  | 3.948145000  |
| Se | -0.900322000 | 3.748638000  | 4.827746000  |
| Ag | 1.128289000  | 2.472927000  | 3.854815000  |
| C  | -0.510431000 | 3.154206000  | 6.727167000  |
| H  | 0.214050000  | 3.857817000  | 7.148332000  |
| H  | -0.086628000 | 2.145716000  | 6.699501000  |
| H  | -1.447087000 | 3.172257000  | 7.292296000  |
| Ag | -0.949136000 | -2.523109000 | -3.682549000 |
| Se | 1.003752000  | -3.619447000 | -5.061212000 |
| Ag | 2.016226000  | -1.539909000 | -3.916785000 |



|    |              |              |              |
|----|--------------|--------------|--------------|
| C  | 0.316756000  | -2.952654000 | -6.848381000 |
| H  | 1.165973000  | -2.654905000 | -7.469804000 |
| H  | -0.360541000 | -2.110831000 | -6.679444000 |
| H  | -0.227053000 | -3.784499000 | -7.306826000 |
| Ag | 1.342510000  | -4.352641000 | 1.157677000  |
| Se | 1.079044000  | -5.192509000 | 3.633334000  |
| Ag | 0.890439000  | -2.591276000 | 3.782861000  |
| C  | 3.046410000  | -5.443753000 | 4.041257000  |
| H  | 3.240366000  | -5.100445000 | 5.061330000  |
| H  | 3.633588000  | -4.873925000 | 3.315393000  |
| H  | 3.258222000  | -6.513451000 | 3.944778000  |
| Ag | -1.008618000 | 2.670384000  | -3.630133000 |
| Se | -1.092911000 | 5.291576000  | -3.679678000 |
| Ag | -1.434813000 | 4.533556000  | -1.190514000 |
| C  | -3.041503000 | 5.614640000  | -4.129558000 |
| H  | -3.215354000 | 6.693255000  | -4.061537000 |
| H  | -3.664783000 | 5.085774000  | -3.402682000 |
| H  | -3.230229000 | 5.255352000  | -5.145390000 |
| Se | -3.316196000 | -3.136939000 | -2.736189000 |
| Se | -4.107184000 | 0.053818000  | 3.413414000  |
| Se | 3.971992000  | 0.054091000  | -3.333074000 |
| Se | 3.599371000  | 1.667612000  | 3.515823000  |
| Se | -4.393896000 | 2.796610000  | -1.571951000 |
| Se | -1.945665000 | -4.695443000 | 0.841570000  |
| Se | 1.999426000  | 4.823027000  | -0.864568000 |
| Se | 4.348261000  | -2.576735000 | 1.581230000  |
| Se | 2.137300000  | -4.442572000 | -1.319388000 |
| Se | 0.984927000  | -0.376750000 | 5.321862000  |
| Se | -1.330192000 | 0.358763000  | -5.077035000 |
| Se | -2.053006000 | 4.673277000  | 1.319890000  |
| C  | -0.733234000 | -0.635467000 | 6.365581000  |
| H  | -1.123857000 | -1.638989000 | 6.181942000  |
| H  | -0.490865000 | -0.506555000 | 7.424907000  |
| H  | -1.458219000 | 0.120229000  | 6.038068000  |
| C  | 0.659495000  | -5.667063000 | -1.973750000 |
| H  | -0.254215000 | -5.440998000 | -1.416171000 |
| H  | 0.984583000  | -6.692961000 | -1.774812000 |
| H  | 0.518375000  | -5.489782000 | -3.043378000 |
| C  | -0.488922000 | 5.853519000  | 1.844913000  |
| H  | 0.416077000  | 5.463872000  | 1.370695000  |
| H  | -0.703126000 | 6.862086000  | 1.479382000  |
| H  | -0.404016000 | 5.827550000  | 2.934787000  |
| C  | 0.347263000  | 0.631958000  | -6.185336000 |
| H  | 0.965911000  | 1.394479000  | -5.707328000 |
| H  | 0.036814000  | 0.948695000  | -7.185753000 |
| H  | 0.891609000  | -0.316849000 | -6.224129000 |
| C  | 4.542322000  | 3.428225000  | 3.175233000  |
| H  | 4.105033000  | 3.906694000  | 2.294140000  |
| H  | 4.416099000  | 4.054920000  | 4.062305000  |
| H  | 5.597904000  | 3.202122000  | 2.998546000  |
| C  | 5.083507000  | -1.467875000 | -2.562581000 |
| H  | 4.410560000  | -2.212707000 | -2.128398000 |
| H  | 5.667101000  | -1.900757000 | -3.379992000 |
| H  | 5.729311000  | -1.042807000 | -1.788285000 |
| C  | -3.370978000 | -1.703229000 | 4.097202000  |
| H  | -2.294876000 | -1.747467000 | 3.897002000  |

|   |              |              |              |
|---|--------------|--------------|--------------|
| H | -3.574901000 | -1.766296000 | 5.170039000  |
| H | -3.885465000 | -2.497677000 | 3.546806000  |
| C | -4.394080000 | -1.774267000 | -3.779979000 |
| H | -3.735250000 | -0.952991000 | -4.076207000 |
| H | -4.792467000 | -2.275939000 | -4.667298000 |
| H | -5.202896000 | -1.415111000 | -3.135709000 |
| C | 4.492439000  | -2.146251000 | 3.558497000  |
| H | 4.409530000  | -1.064585000 | 3.700064000  |
| H | 5.466838000  | -2.508516000 | 3.900300000  |
| H | 3.677666000  | -2.659772000 | 4.078353000  |
| C | -2.273874000 | -5.241325000 | 2.763533000  |
| H | -2.047551000 | -4.396385000 | 3.419581000  |
| H | -3.321719000 | -5.539253000 | 2.858718000  |
| H | -1.602398000 | -6.077768000 | 2.979465000  |
| C | 2.357806000  | 5.041213000  | -2.849701000 |
| H | 2.284496000  | 4.064199000  | -3.334582000 |
| H | 3.358633000  | 5.463339000  | -2.973826000 |
| H | 1.590336000  | 5.717169000  | -3.239385000 |
| C | -4.551860000 | 2.267899000  | -3.524977000 |
| H | -4.224640000 | 1.233862000  | -3.650615000 |
| H | -5.600715000 | 2.378752000  | -3.816843000 |
| H | -3.907649000 | 2.932391000  | -4.108497000 |

115

Ag25(TeMe)18- S0 Ground State

|    |              |              |              |
|----|--------------|--------------|--------------|
| Ag | -0.016690000 | 0.041455000  | 0.065368000  |
| Ag | -2.150308000 | 1.463119000  | -1.014214000 |
| Ag | -0.696093000 | -2.465641000 | 1.173532000  |
| Ag | 0.639827000  | 2.548695000  | -1.026511000 |
| Ag | 2.105146000  | -1.392099000 | 1.131276000  |
| Ag | -2.009306000 | -1.448953000 | -1.237692000 |
| Ag | 2.385290000  | 0.244336000  | -1.298766000 |
| Ag | -2.451152000 | -0.133112000 | 1.392052000  |
| Ag | 1.960310000  | 1.523682000  | 1.350348000  |
| Ag | -0.143814000 | 0.209951000  | -2.696731000 |
| Ag | -0.864391000 | 2.321013000  | 1.473506000  |
| Ag | 0.832472000  | -2.235496000 | -1.316191000 |
| Ag | 0.037000000  | -0.191895000 | 2.825700000  |
| Ag | 3.813229000  | 2.720564000  | -0.764276000 |
| Te | 6.369566000  | 2.315377000  | 0.343302000  |
| Ag | 4.550886000  | 0.261860000  | 0.837227000  |
| C  | 7.444338000  | 1.788005000  | -1.531297000 |
| H  | 8.031902000  | 0.884901000  | -1.347749000 |
| H  | 6.696601000  | 1.622886000  | -2.314968000 |
| H  | 8.085657000  | 2.636396000  | -1.781920000 |
| Ag | -4.655641000 | 0.005926000  | -0.459946000 |
| Te | -6.180971000 | -2.312112000 | -0.327988000 |
| Ag | -3.645723000 | -2.886621000 | 0.666237000  |
| C  | -7.415124000 | -1.697921000 | 1.430242000  |
| H  | -8.290962000 | -1.168378000 | 1.048807000  |
| H  | -6.802388000 | -1.035379000 | 2.049386000  |
| H  | -7.700723000 | -2.601597000 | 1.974035000  |
| Ag | -2.160420000 | 1.552116000  | 3.962318000  |
| Te | -1.055076000 | 3.506068000  | 5.577166000  |
| Ag | 0.914581000  | 2.319658000  | 3.994946000  |
| C  | -0.642918000 | 2.362319000  | 7.455376000  |
| H  | -0.102154000 | 3.029793000  | 8.135043000  |

|    |              |              |              |
|----|--------------|--------------|--------------|
| H  | -0.019146000 | 1.502671000  | 7.188675000  |
| H  | -1.598440000 | 2.044344000  | 7.882083000  |
| Ag | -0.784996000 | -2.406546000 | -3.818880000 |
| Te | 1.237122000  | -3.369365000 | -5.525763000 |
| Ag | 2.117211000  | -1.343379000 | -3.840672000 |
| C  | 0.535927000  | -2.337395000 | -7.375101000 |
| H  | 1.392049000  | -1.858662000 | -7.860878000 |
| H  | -0.220989000 | -1.600941000 | -7.082861000 |
| H  | 0.091953000  | -3.106380000 | -8.016723000 |
| Ag | 1.704968000  | -4.266514000 | 0.865457000  |
| Te | 1.594566000  | -5.589199000 | 3.341998000  |
| Ag | 1.070581000  | -2.861352000 | 3.531782000  |
| C  | 3.713896000  | -5.504525000 | 4.031780000  |
| H  | 3.732280000  | -5.154617000 | 5.066096000  |
| H  | 4.245810000  | -4.818359000 | 3.364764000  |
| H  | 4.118757000  | -6.516907000 | 3.946500000  |
| Ag | -1.173043000 | 2.821662000  | -3.463056000 |
| Te | -1.377260000 | 5.555177000  | -3.193565000 |
| Ag | -1.721188000 | 4.327485000  | -0.698311000 |
| C  | -3.514195000 | 5.800986000  | -3.800028000 |
| H  | -3.745108000 | 6.866441000  | -3.722619000 |
| H  | -4.125483000 | 5.227196000  | -3.097829000 |
| H  | -3.638237000 | 5.439870000  | -4.822615000 |
| Te | -3.368134000 | -3.158662000 | -2.989776000 |
| Te | -4.526637000 | 0.290028000  | 3.204854000  |
| Te | 4.304597000  | 0.339485000  | -3.309613000 |
| Te | 3.676141000  | 2.293370000  | 3.435986000  |
| Te | -4.622155000 | 2.730898000  | -1.285451000 |
| Te | -1.931086000 | -4.948488000 | 1.486558000  |
| Te | 2.210332000  | 4.619763000  | -2.043439000 |
| Te | 4.607181000  | -2.411764000 | 1.761590000  |
| Te | 1.894113000  | -4.733649000 | -1.882733000 |
| Te | 0.925414000  | -0.758890000 | 5.416892000  |
| Te | -1.217949000 | 0.641891000  | -5.249469000 |
| Te | -1.506868000 | 4.965298000  | 2.025985000  |
| C  | -1.149916000 | -1.106868000 | 6.175500000  |
| H  | -1.552343000 | -1.987546000 | 5.673338000  |
| H  | -1.072999000 | -1.258812000 | 7.254644000  |
| H  | -1.738918000 | -0.212937000 | 5.941267000  |
| C  | -0.152517000 | -5.604886000 | -2.108273000 |
| H  | -0.827758000 | -5.042640000 | -1.458431000 |
| H  | -0.100611000 | -6.653225000 | -1.807975000 |
| H  | -0.426996000 | -5.486582000 | -3.160030000 |
| C  | 0.675671000  | 5.430689000  | 1.922294000  |
| H  | 1.143001000  | 4.706823000  | 1.249188000  |
| H  | 0.788777000  | 6.449455000  | 1.541988000  |
| H  | 1.061004000  | 5.321208000  | 2.939566000  |
| C  | 0.746974000  | 0.988566000  | -6.248677000 |
| H  | 1.239371000  | 1.819787000  | -5.741911000 |
| H  | 0.542956000  | 1.219517000  | -7.296790000 |
| H  | 1.326771000  | 0.067335000  | -6.141771000 |
| C  | 4.028258000  | 4.374398000  | 2.693306000  |
| H  | 3.574901000  | 4.463412000  | 1.701652000  |
| H  | 3.569010000  | 5.058473000  | 3.409430000  |
| H  | 5.113645000  | 4.499558000  | 2.638395000  |
| C  | 5.490946000  | -1.231146000 | -2.252857000 |

|   |              |              |              |
|---|--------------|--------------|--------------|
| H | 4.808380000  | -2.033829000 | -1.967554000 |
| H | 6.257884000  | -1.584790000 | -2.943829000 |
| H | 5.925112000  | -0.754993000 | -1.369660000 |
| C | -4.112506000 | -1.758820000 | 3.968866000  |
| H | -3.047856000 | -1.950688000 | 3.818404000  |
| H | -4.378729000 | -1.792213000 | 5.028997000  |
| H | -4.717524000 | -2.449633000 | 3.372607000  |
| C | -4.443920000 | -1.428159000 | -3.905263000 |
| H | -3.701516000 | -0.779153000 | -4.378940000 |
| H | -5.137124000 | -1.833603000 | -4.647906000 |
| H | -4.982955000 | -0.917163000 | -3.101955000 |
| C | 4.462217000  | -1.803210000 | 3.902543000  |
| H | 4.071236000  | -0.782652000 | 3.934811000  |
| H | 5.468674000  | -1.847387000 | 4.326137000  |
| H | 3.784048000  | -2.501934000 | 4.401303000  |
| C | -2.193755000 | -4.866855000 | 3.708422000  |
| H | -2.943096000 | -4.109976000 | 3.942113000  |
| H | -2.526441000 | -5.867019000 | 4.007219000  |
| H | -1.219418000 | -4.627875000 | 4.147609000  |
| C | 2.295915000  | 3.595609000  | -4.027886000 |
| H | 2.194987000  | 2.523118000  | -3.845018000 |
| H | 3.259678000  | 3.830915000  | -4.485837000 |
| H | 1.458373000  | 3.984110000  | -4.614359000 |
| C | -4.692707000 | 2.383198000  | -3.488925000 |
| H | -4.562396000 | 1.315257000  | -3.670143000 |
| H | -5.663845000 | 2.732574000  | -3.845020000 |
| H | -3.875681000 | 2.956906000  | -3.935329000 |

115

Ag25(SMe)18- S1 Excited State

|    |              |              |              |
|----|--------------|--------------|--------------|
| Ag | -0.049948000 | 0.035598000  | 0.068468000  |
| Ag | -2.153769000 | 1.526892000  | -1.002491000 |
| Ag | -0.752348000 | -2.467425000 | 1.160146000  |
| Ag | 0.627206000  | 2.539145000  | -1.014998000 |
| Ag | 2.042838000  | -1.461905000 | 1.131588000  |
| Ag | -2.108012000 | -1.345527000 | -1.269080000 |
| Ag | 2.380234000  | 0.266902000  | -1.269572000 |
| Ag | -2.518843000 | -0.163618000 | 1.368075000  |
| Ag | 2.002002000  | 1.417696000  | 1.385929000  |
| Ag | -0.154224000 | 0.298057000  | -2.694732000 |
| Ag | -0.830012000 | 2.240779000  | 1.554479000  |
| Ag | 0.738483000  | -2.196631000 | -1.392723000 |
| Ag | -0.012980000 | -0.283031000 | 2.849196000  |
| Ag | 3.807284000  | 2.717033000  | -0.623640000 |
| Te | 6.358977000  | 2.206932000  | 0.416497000  |
| Ag | 4.533582000  | 0.136808000  | 0.819309000  |
| C  | 7.381772000  | 1.749551000  | -1.502877000 |
| H  | 8.007265000  | 0.865189000  | -1.359983000 |
| H  | 6.609875000  | 1.573416000  | -2.259006000 |
| H  | 7.983489000  | 2.623894000  | -1.766706000 |
| Ag | -4.689191000 | 0.115797000  | -0.477968000 |
| Te | -6.281596000 | -2.159558000 | -0.331752000 |
| Ag | -3.733144000 | -2.839892000 | 0.548162000  |
| C  | -7.416471000 | -1.476881000 | 1.463191000  |
| H  | -8.181871000 | -0.777438000 | 1.120451000  |
| H  | -6.707223000 | -0.978272000 | 2.132658000  |
| H  | -7.858665000 | -2.356925000 | 1.936246000  |

|    |              |              |              |
|----|--------------|--------------|--------------|
| Ag | -2.089314000 | 1.503715000  | 4.080701000  |
| Te | -1.018896000 | 3.605464000  | 5.548314000  |
| Ag | 0.897279000  | 2.226669000  | 4.047948000  |
| C  | -0.509259000 | 2.536861000  | 7.449812000  |
| H  | 0.142897000  | 3.194213000  | 8.030902000  |
| H  | 0.015052000  | 1.617604000  | 7.174894000  |
| H  | -1.440915000 | 2.324888000  | 7.980228000  |
| Ag | -0.827811000 | -2.256105000 | -3.915205000 |
| Te | 1.180981000  | -3.374676000 | -5.553341000 |
| Ag | 2.058533000  | -1.333351000 | -3.876239000 |
| C  | 0.524704000  | -2.306863000 | -7.400603000 |
| H  | 1.400735000  | -1.855325000 | -7.873236000 |
| H  | -0.212398000 | -1.552714000 | -7.111890000 |
| H  | 0.072066000  | -3.060017000 | -8.050892000 |
| Ag | 1.549313000  | -4.313763000 | 0.989754000  |
| Te | 1.511231000  | -5.645156000 | 3.489033000  |
| Ag | 0.953154000  | -2.885191000 | 3.535765000  |
| C  | 3.666728000  | -5.566703000 | 4.034479000  |
| H  | 3.758332000  | -5.112741000 | 5.023545000  |
| H  | 4.178954000  | -4.973488000 | 3.271745000  |
| H  | 4.033190000  | -6.596753000 | 4.036406000  |
| Ag | -1.142936000 | 2.881062000  | -3.412449000 |
| Te | -1.401556000 | 5.670422000  | -3.407613000 |
| Ag | -1.601939000 | 4.409665000  | -0.884358000 |
| C  | -3.557924000 | 5.828972000  | -3.978620000 |
| H  | -3.801169000 | 6.895005000  | -3.993324000 |
| H  | -4.139007000 | 5.308303000  | -3.212472000 |
| H  | -3.694411000 | 5.375816000  | -4.963388000 |
| Te | -3.376493000 | -3.102653000 | -3.063349000 |
| Te | -4.392658000 | 0.132101000  | 3.426163000  |
| Te | 4.246010000  | 0.309177000  | -3.341682000 |
| Te | 3.658081000  | 2.193732000  | 3.525365000  |
| Te | -4.611078000 | 2.843502000  | -1.255786000 |
| Te | -2.015728000 | -4.958144000 | 1.216992000  |
| Te | 2.230323000  | 4.663398000  | -1.861646000 |
| Te | 4.545426000  | -2.541592000 | 1.706597000  |
| Te | 1.975859000  | -4.635414000 | -1.748828000 |
| Te | 0.881377000  | -0.756030000 | 5.485490000  |
| Te | -1.216975000 | 0.685573000  | -5.276790000 |
| Te | -1.507028000 | 4.889820000  | 1.861043000  |
| C  | -1.136980000 | -1.043965000 | 6.397033000  |
| H  | -1.599611000 | -1.917232000 | 5.933523000  |
| H  | -0.983483000 | -1.193960000 | 7.469203000  |
| H  | -1.720523000 | -0.138329000 | 6.199435000  |
| C  | 0.047136000  | -5.637731000 | -2.251536000 |
| H  | -0.596199000 | -5.573982000 | -1.370945000 |
| H  | 0.284418000  | -6.676600000 | -2.495872000 |
| H  | -0.374762000 | -5.106062000 | -3.109147000 |
| C  | 0.651832000  | 5.430012000  | 1.990515000  |
| H  | 1.130285000  | 5.107006000  | 1.062219000  |
| H  | 0.713110000  | 6.515905000  | 2.115395000  |
| H  | 1.055670000  | 4.897679000  | 2.857547000  |
| C  | 0.779017000  | 1.050466000  | -6.201801000 |
| H  | 1.269470000  | 1.847760000  | -5.639153000 |
| H  | 0.609978000  | 1.340149000  | -7.242552000 |
| H  | 1.345614000  | 0.115752000  | -6.130584000 |

|   |              |              |              |
|---|--------------|--------------|--------------|
| C | 4.012867000  | 4.272380000  | 2.777477000  |
| H | 3.495155000  | 4.375388000  | 1.818730000  |
| H | 3.617660000  | 4.960758000  | 3.529534000  |
| H | 5.093897000  | 4.375086000  | 2.645685000  |
| C | 5.390313000  | -1.311841000 | -2.304687000 |
| H | 4.666173000  | -2.035542000 | -1.921026000 |
| H | 6.056595000  | -1.767316000 | -3.042045000 |
| H | 5.941567000  | -0.837780000 | -1.486873000 |
| C | -3.843576000 | -1.946258000 | 4.023215000  |
| H | -2.774651000 | -2.079848000 | 3.836939000  |
| H | -4.090165000 | -2.077636000 | 5.080112000  |
| H | -4.430166000 | -2.613173000 | 3.382994000  |
| C | -4.474006000 | -1.354954000 | -3.918139000 |
| H | -3.731819000 | -0.656933000 | -4.315176000 |
| H | -5.116703000 | -1.737075000 | -4.714566000 |
| H | -5.061355000 | -0.909297000 | -3.109993000 |
| C | 4.389791000  | -1.987177000 | 3.862860000  |
| H | 4.135685000  | -0.924145000 | 3.919911000  |
| H | 5.362293000  | -2.183835000 | 4.322401000  |
| H | 3.604943000  | -2.608271000 | 4.305438000  |
| C | -2.242687000 | -5.059331000 | 3.432842000  |
| H | -3.125661000 | -4.483054000 | 3.710904000  |
| H | -2.359162000 | -6.118741000 | 3.678983000  |
| H | -1.333946000 | -4.647500000 | 3.888516000  |
| C | 2.302529000  | 3.708287000  | -3.876428000 |
| H | 2.281907000  | 2.623723000  | -3.728268000 |
| H | 3.228619000  | 4.021210000  | -4.369784000 |
| H | 1.415572000  | 4.054495000  | -4.415593000 |
| C | -4.692345000 | 2.488636000  | -3.461047000 |
| H | -4.715567000 | 1.411315000  | -3.634033000 |
| H | -5.599083000 | 2.973842000  | -3.832583000 |
| H | -3.795883000 | 2.938050000  | -3.897410000 |
